# Supplementary material
Source: PubMed Central journal article supplement (PMC3769333)
Supplement: supp_O113.028258_mcp.O113.028258-1.pdf [file supp_O113.028258_mcp.O113.028258-1.pdf]

**Supporting Information:**

High-Throughput Database Search and Large-Scale Negative Polarity  
LC-MS/MS with Ultraviolet Photodissociation for Complex Proteomic  
Samples

*James A. Madsen,<sup>1</sup> Hua Xu,<sup>2</sup> Michelle R. Robinson,<sup>1</sup> Jared B. Shaw,<sup>1</sup> David K. Giles,<sup>3</sup> Tamer S.  
Kaoud,<sup>5</sup> Kevin N. Dalby,<sup>5</sup> M. Stephen Trent,<sup>3,4</sup> and Jennifer S. Brodbelt\*<sup>1</sup>*

**Scheme 1.** Flow diagram of the optimization of the *in silico* fragmentation pathways for MassMatrix UVPD search algorithm.

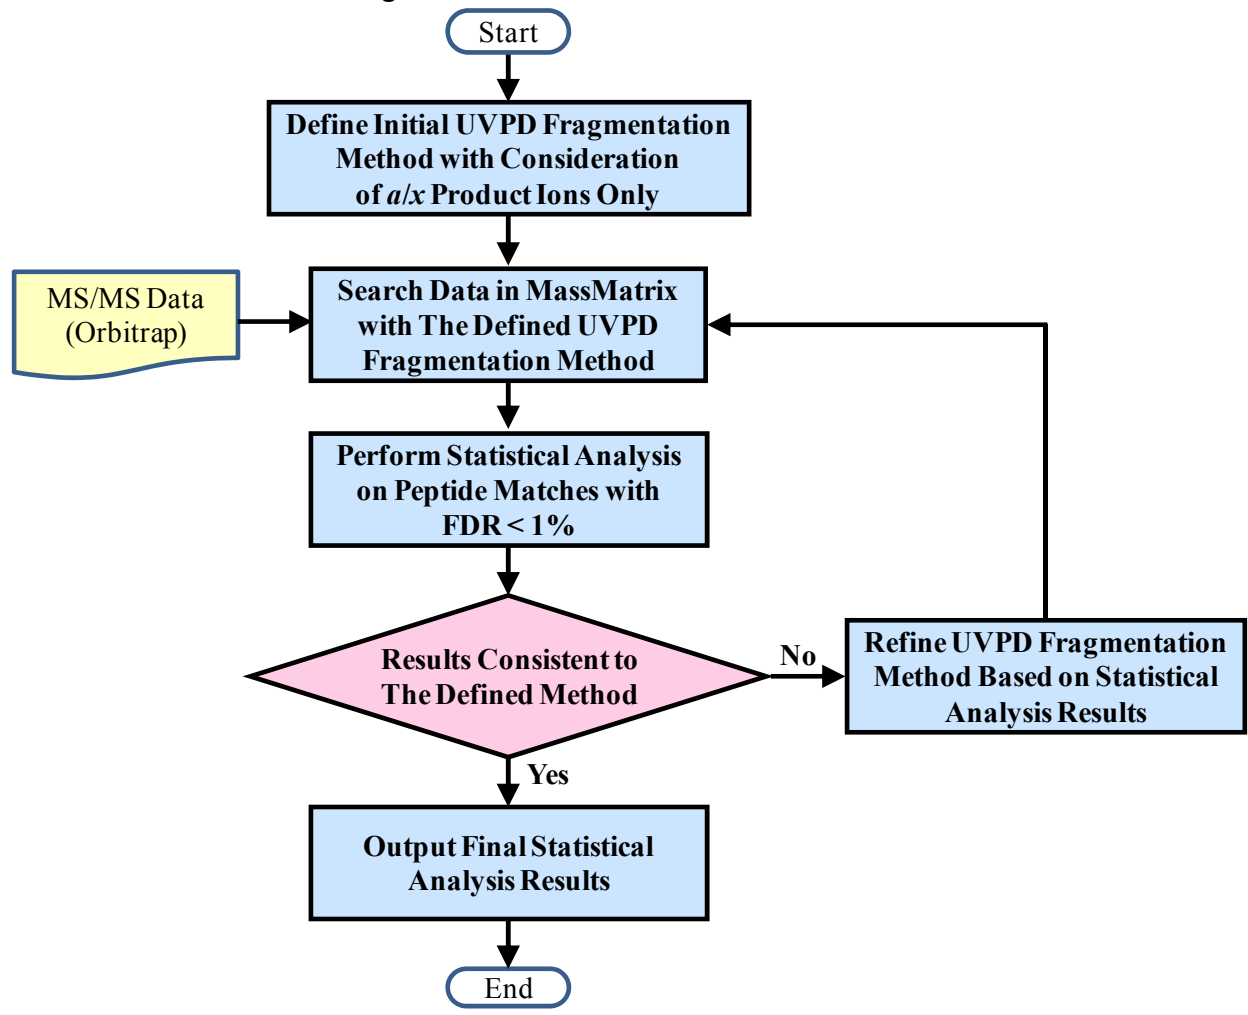

**Supplemental Figure 1.** Example spectra for MS/MS of tryptic HeLa peptide anions acquired on an Orbitrap Elite mass spectrometer. 193 nm UVPD of (A) Isoform alpha-enolase of Alpha-enolase peptide YISPDQLADLYK, 1- ( $m/z$  1423.71), (B) KRT13 42 kDa protein peptide DAEDWFFSK, 2- ( $m/z$  570.74), and (C) Phosphoglycerate kinase 1 peptide VLNNMEIGTSLFDEEGAK, 3- ( $m/z$  654.64).

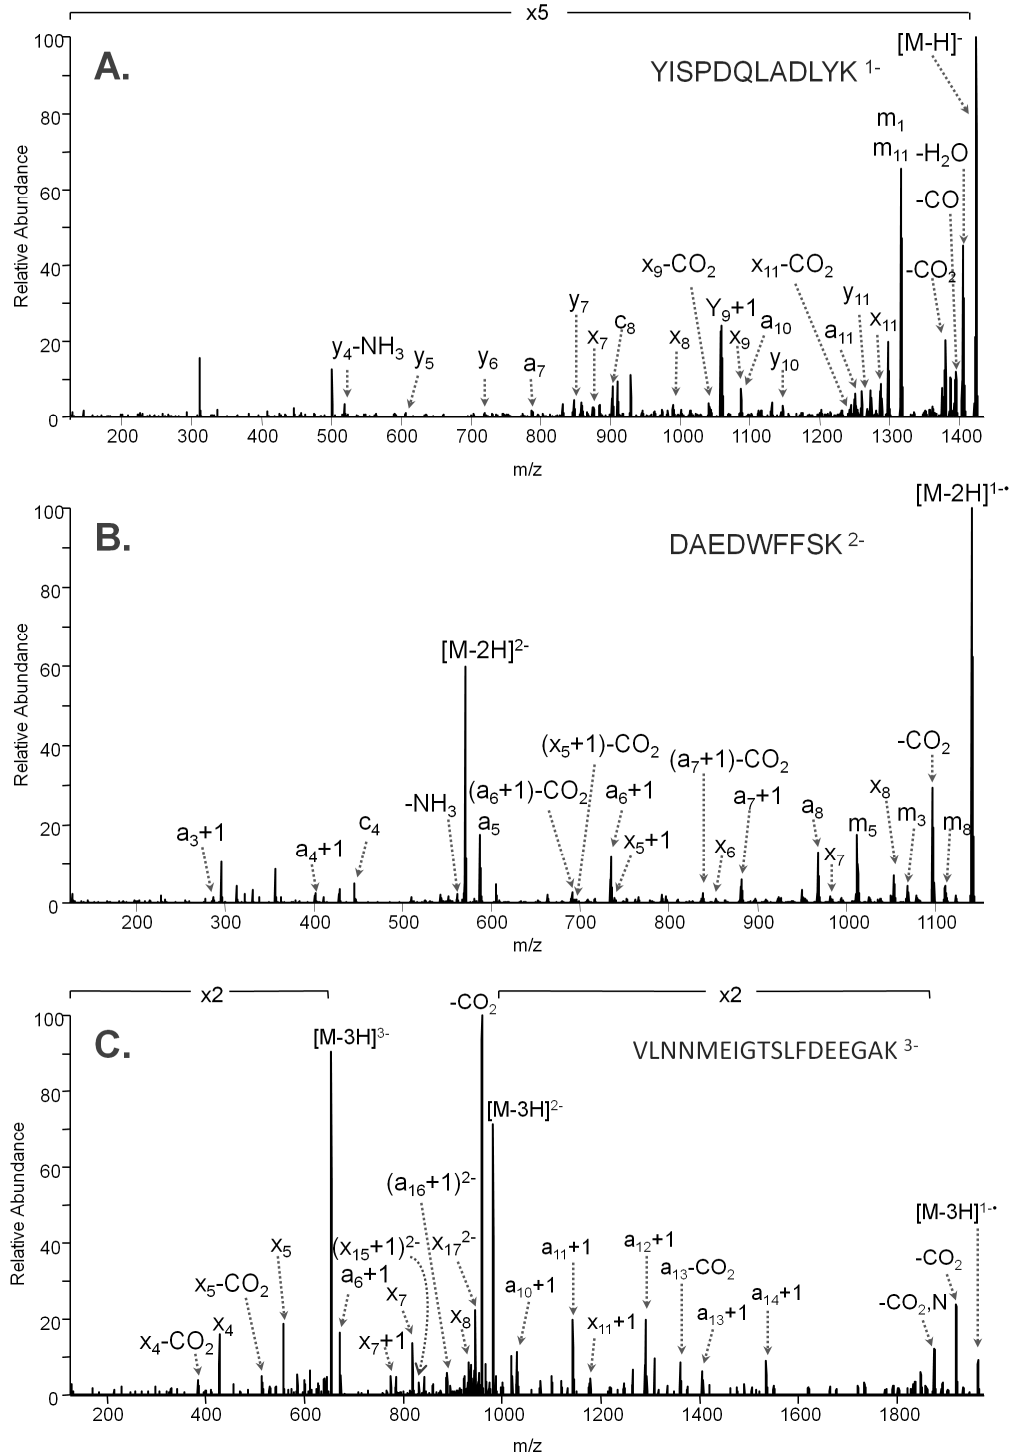

**Supplemental Figure 2.** LC chromatographic trace and representative UVPD spectrum of a tryptic peptide anion from a *Halobacterium* lysate. The peptide (retention time 145.5 min) maps to the Thermosome subunit alpha protein.

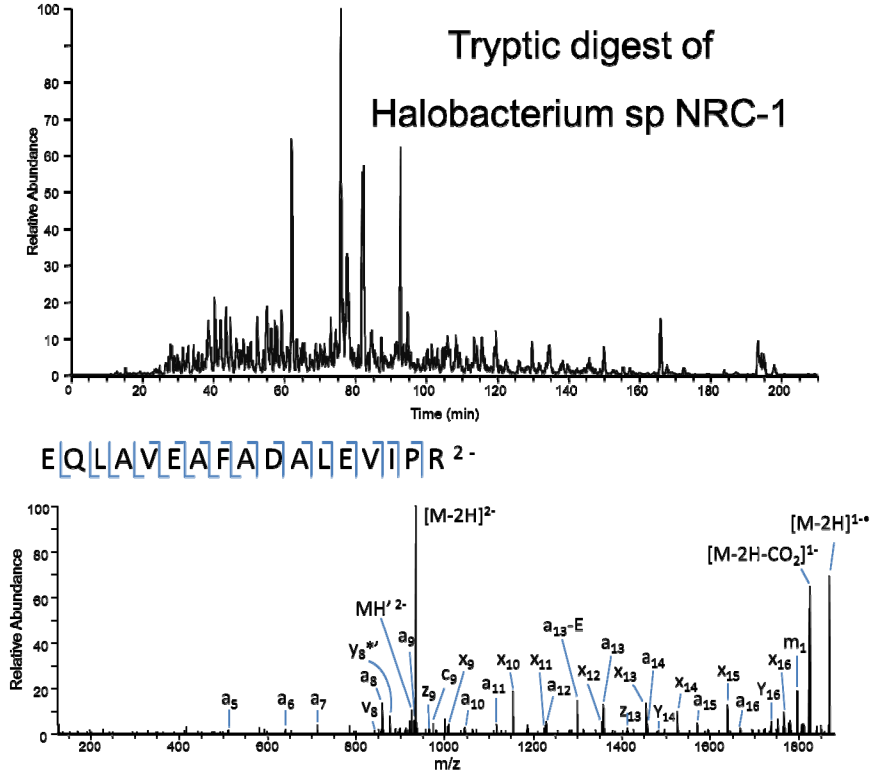

**Supplemental Figure 3.** Amino acid composition analysis for peptides unique to different fragmentation methods for HeLa and Halo digests.

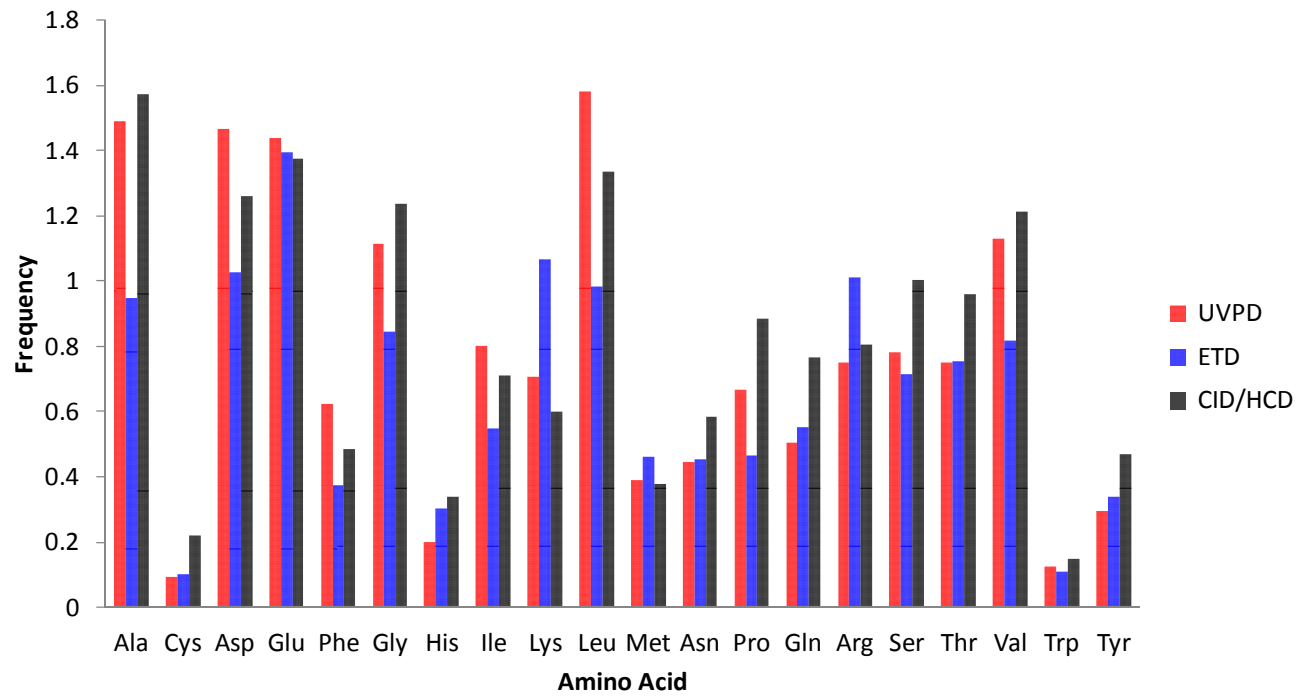

**Supplemental Figure 4.** Accuracy of charge state assignment algorithm for (A) charges 1- through 5- of a known mixture of three mitogen-activated kinases (MAPKs) and (B) charges 1- through 3- of a complex mixture of a HeLa tryptic digest.

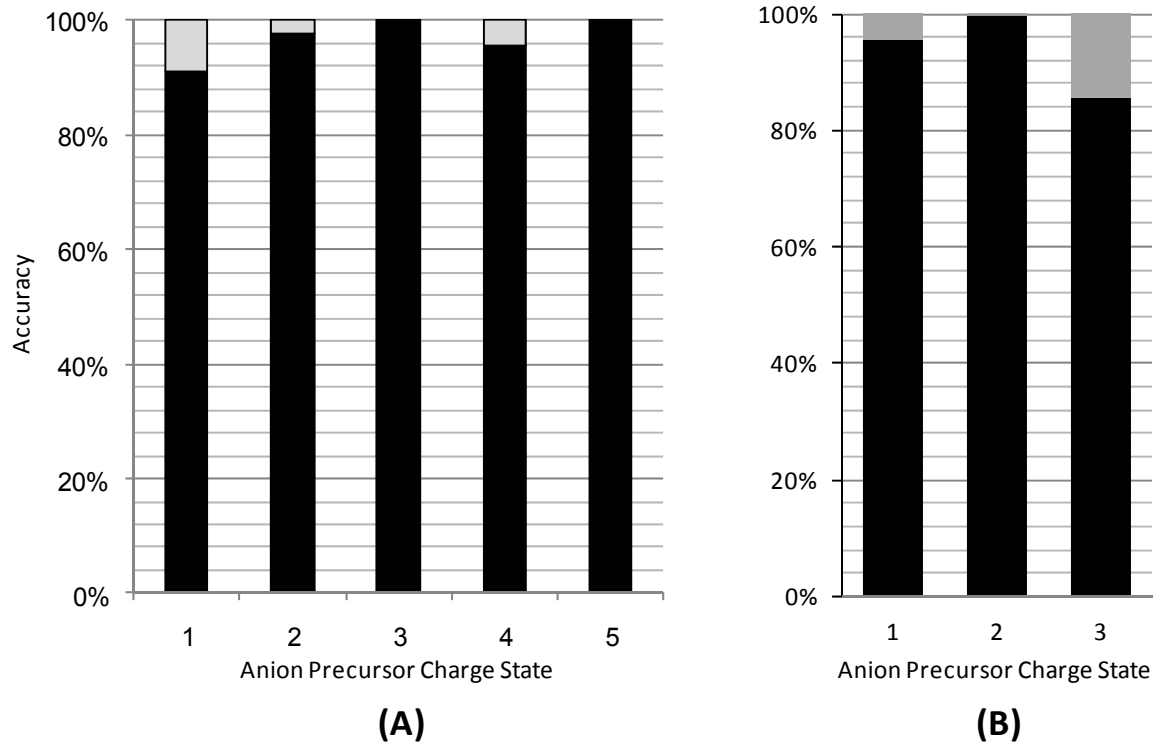

**Supplemental Figure 5.** Base peak chromatogram of tryptic peptides from a known mixture of three mitogen-activated kinases (MAPKs) (left portion of figure). The sequence coverage of the MAPKs after MassMatrix analysis (right portion of figure).

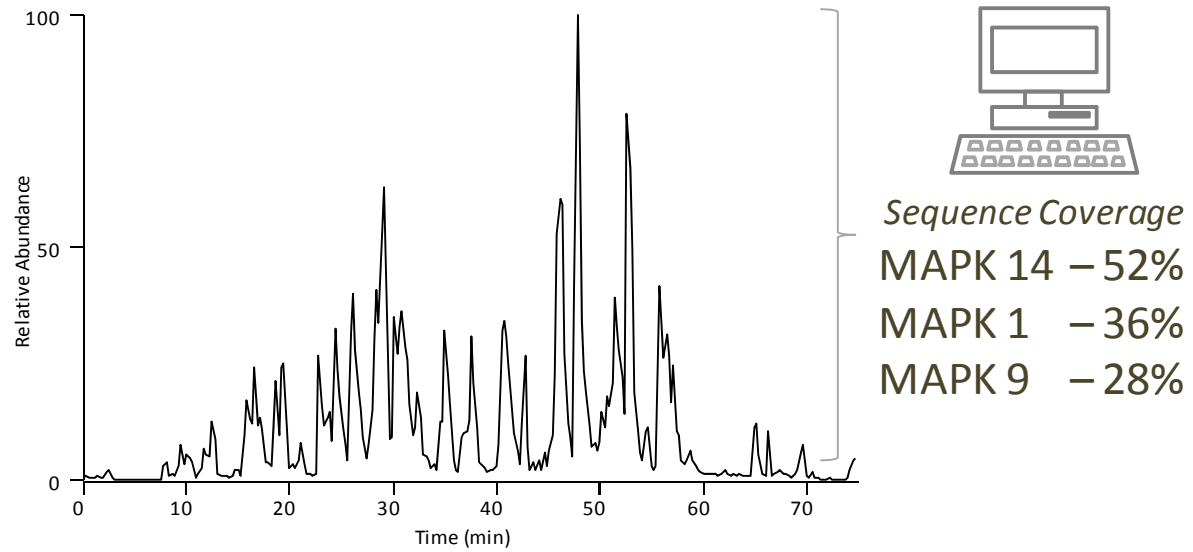

**Supplemental Figure 6.** Polarity switching nanoLC-MS/MS for sequencing of cation (ETD) and anion (193 nm UVPD) tryptic HeLa peptides in a single run. (A) Extracted negative polarity base peak chromatogram. (B) Extracted positive polarity base peak chromatogram. (C) 193 nm UVPD of pyruvate kinase isozyme peptide GDLGIEIPAEK, 2-, retention time 71.18 min. (D) ETD of triosephosphate isomerase peptide KQSLGELIGTLNAAK, 3+, retention time 100.05 min.

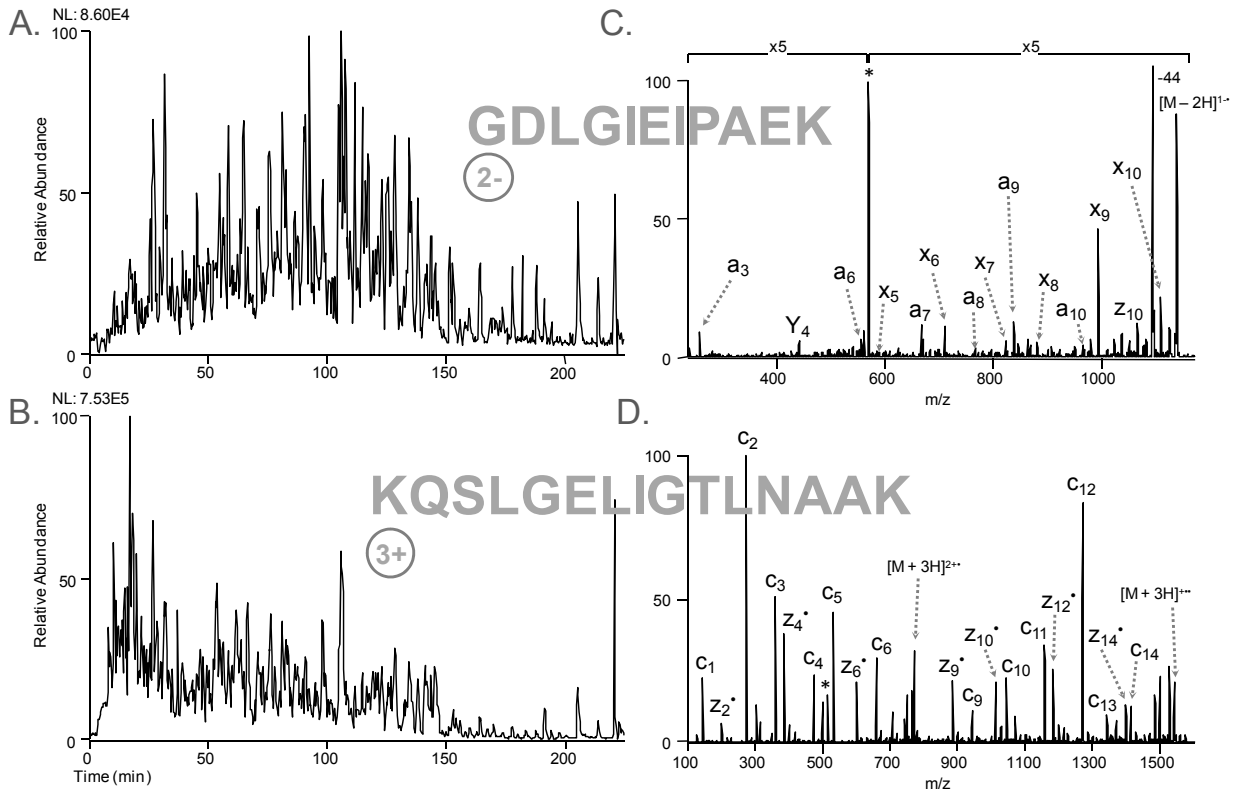



**Supplemental Figure 7.** Polarity switching nanoLC-MS/MS for sequencing of cation (ETD) and anion (193 nm UVPD) tryptic HeLa peptides in a single run. (A) Sequence coverage of proteins identified by positive ETD only versus positive ETD plus negative UVPD. (B) Number of unique peptides and peptide spectral matches (PSM) identified by positive ETD only versus positive ETD plus negative UVPD.

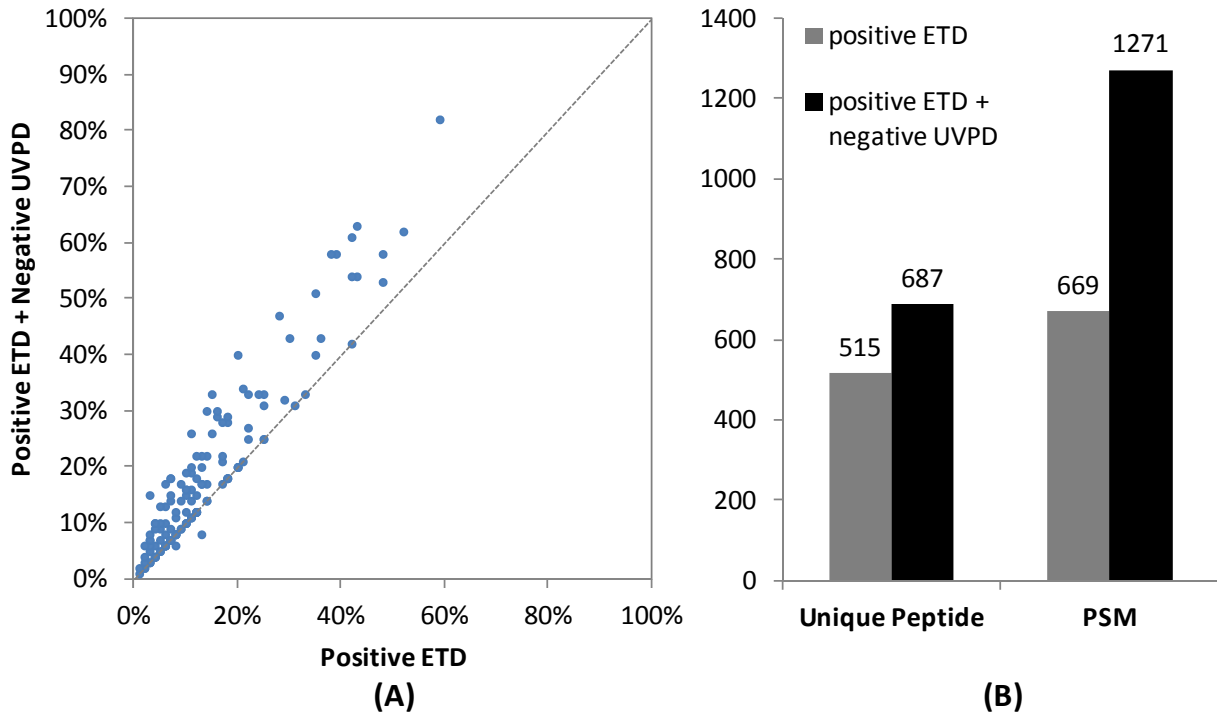

**Supplemental Table 1.** Links to Peptide Atlas Data Archive for Orbitrap raw datasets:

| Dataset tag  | Link to dataset                                                                                     | Identifier |
|--------------|-----------------------------------------------------------------------------------------------------|------------|
| HeLa_1_NUVPD | <a href="http://www.peptideatlas.org/PASS/PASS00163">http://www.peptideatlas.org/PASS/PASS00163</a> | PASS00163  |
| HeLa_2_NUVPD | <a href="http://www.peptideatlas.org/PASS/PASS00164">http://www.peptideatlas.org/PASS/PASS00164</a> | PASS00164  |
| HeLa_3_NUVPD | <a href="http://www.peptideatlas.org/PASS/PASS00165">http://www.peptideatlas.org/PASS/PASS00165</a> | PASS00165  |
| HeLa_1_CID   | <a href="http://www.peptideatlas.org/PASS/PASS00166">http://www.peptideatlas.org/PASS/PASS00166</a> | PASS00166  |
| HeLa_2_CID   | <a href="http://www.peptideatlas.org/PASS/PASS00167">http://www.peptideatlas.org/PASS/PASS00167</a> | PASS00167  |
| HeLa_3_CID   | <a href="http://www.peptideatlas.org/PASS/PASS00168">http://www.peptideatlas.org/PASS/PASS00168</a> | PASS00168  |
| HeLa_HCD_1   | <a href="http://www.peptideatlas.org/PASS/PASS00148">http://www.peptideatlas.org/PASS/PASS00148</a> | PASS00148  |
| HeLa_HCD_2   | <a href="http://www.peptideatlas.org/PASS/PASS00149">http://www.peptideatlas.org/PASS/PASS00149</a> | PASS00149  |
| HeLa_HCD_3   | <a href="http://www.peptideatlas.org/PASS/PASS00150">http://www.peptideatlas.org/PASS/PASS00150</a> | PASS00150  |
| HeLa_1_ETD   | <a href="http://www.peptideatlas.org/PASS/PASS00169">http://www.peptideatlas.org/PASS/PASS00169</a> | PASS00169  |
| HeLa_2_ETD   | <a href="http://www.peptideatlas.org/PASS/PASS00170">http://www.peptideatlas.org/PASS/PASS00170</a> | PASS00170  |
| HeLa_ETD_3   | <a href="http://www.peptideatlas.org/PASS/PASS00171">http://www.peptideatlas.org/PASS/PASS00171</a> | PASS00171  |
| Halo_NUVPD_1 | <a href="http://www.peptideatlas.org/PASS/PASS00160">http://www.peptideatlas.org/PASS/PASS00160</a> | PASS00160  |
| Halo_NUVPD_2 | <a href="http://www.peptideatlas.org/PASS/PASS00161">http://www.peptideatlas.org/PASS/PASS00161</a> | PASS00161  |
| Halo_NUVPD_3 | <a href="http://www.peptideatlas.org/PASS/PASS00162">http://www.peptideatlas.org/PASS/PASS00162</a> | PASS00162  |
| Halo_CID_1   | <a href="http://www.peptideatlas.org/PASS/PASS00151">http://www.peptideatlas.org/PASS/PASS00151</a> | PASS00151  |
| Halo_CID_2   | <a href="http://www.peptideatlas.org/PASS/PASS00152">http://www.peptideatlas.org/PASS/PASS00152</a> | PASS00152  |
| Halo_CID_3   | <a href="http://www.peptideatlas.org/PASS/PASS00153">http://www.peptideatlas.org/PASS/PASS00153</a> | PASS00153  |
| Halo_HCD_1   | <a href="http://www.peptideatlas.org/PASS/PASS00154">http://www.peptideatlas.org/PASS/PASS00154</a> | PASS00154  |
| Halo_HCD_2   | <a href="http://www.peptideatlas.org/PASS/PASS00155">http://www.peptideatlas.org/PASS/PASS00155</a> | PASS00155  |
| Halo_HCD_3   | <a href="http://www.peptideatlas.org/PASS/PASS00156">http://www.peptideatlas.org/PASS/PASS00156</a> | PASS00156  |
| Halo_ETD_1   | <a href="http://www.peptideatlas.org/PASS/PASS00157">http://www.peptideatlas.org/PASS/PASS00157</a> | PASS00157  |
| Halo_ETD_2   | <a href="http://www.peptideatlas.org/PASS/PASS00158">http://www.peptideatlas.org/PASS/PASS00158</a> | PASS00158  |
| Halo_ETD_3   | <a href="http://www.peptideatlas.org/PASS/PASS00159">http://www.peptideatlas.org/PASS/PASS00159</a> | PASS00159  |

**Supplemental Table 2.** Links to Peptide Atlas Data Archive for LTQ raw datasets:

| Dataset tag          | Link to dataset                                                                                     | Identifier |
|----------------------|-----------------------------------------------------------------------------------------------------|------------|
| HeLa_ETD_UVPD_switch | <a href="http://www.peptideatlas.org/PASS/PASS00179">http://www.peptideatlas.org/PASS/PASS00179</a> | PASS00179  |
| MAPKmix_CID_1        | <a href="http://www.peptideatlas.org/PASS/PASS00180">http://www.peptideatlas.org/PASS/PASS00180</a> | PASS00180  |
| MAPKmix_CID_2        | <a href="http://www.peptideatlas.org/PASS/PASS00181">http://www.peptideatlas.org/PASS/PASS00181</a> | PASS00181  |
| MAPKmix_CID_3        | <a href="http://www.peptideatlas.org/PASS/PASS00182">http://www.peptideatlas.org/PASS/PASS00182</a> | PASS00182  |
| MAPKmix_UVPD_1       | <a href="http://www.peptideatlas.org/PASS/PASS00183">http://www.peptideatlas.org/PASS/PASS00183</a> | PASS00183  |
| MAPKmix_UVPD_2       | <a href="http://www.peptideatlas.org/PASS/PASS00184">http://www.peptideatlas.org/PASS/PASS00184</a> | PASS00184  |
| MAPKmix_UVPD_3       | <a href="http://www.peptideatlas.org/PASS/PASS00185">http://www.peptideatlas.org/PASS/PASS00185</a> | PASS00185  |

**Supplemental Table 3.** Links to Peptide Atlas data archive for peptide and protein match lists from MassMatrix searches

| Dataset tag          | Link to dataset                                                                                     | Identifier |
|----------------------|-----------------------------------------------------------------------------------------------------|------------|
| Halo_match_lists     | <a href="http://www.peptideatlas.org/PASS/PASS00186">http://www.peptideatlas.org/PASS/PASS00186</a> | PASS00186  |
| HeLa_orbi_match_list | <a href="http://www.peptideatlas.org/PASS/PASS00187">http://www.peptideatlas.org/PASS/PASS00187</a> | PASS00187  |
| All for LTQ HeLa     | <a href="http://www.peptideatlas.org/PASS/PASS00199">http://www.peptideatlas.org/PASS/PASS00199</a> | PASS00199  |
| All for MAPK         | <a href="http://www.peptideatlas.org/PASS/PASS00200">http://www.peptideatlas.org/PASS/PASS00200</a> | PASS00200  |
